Adjusted for non-feeding time

Not adjusted for non-feeding time

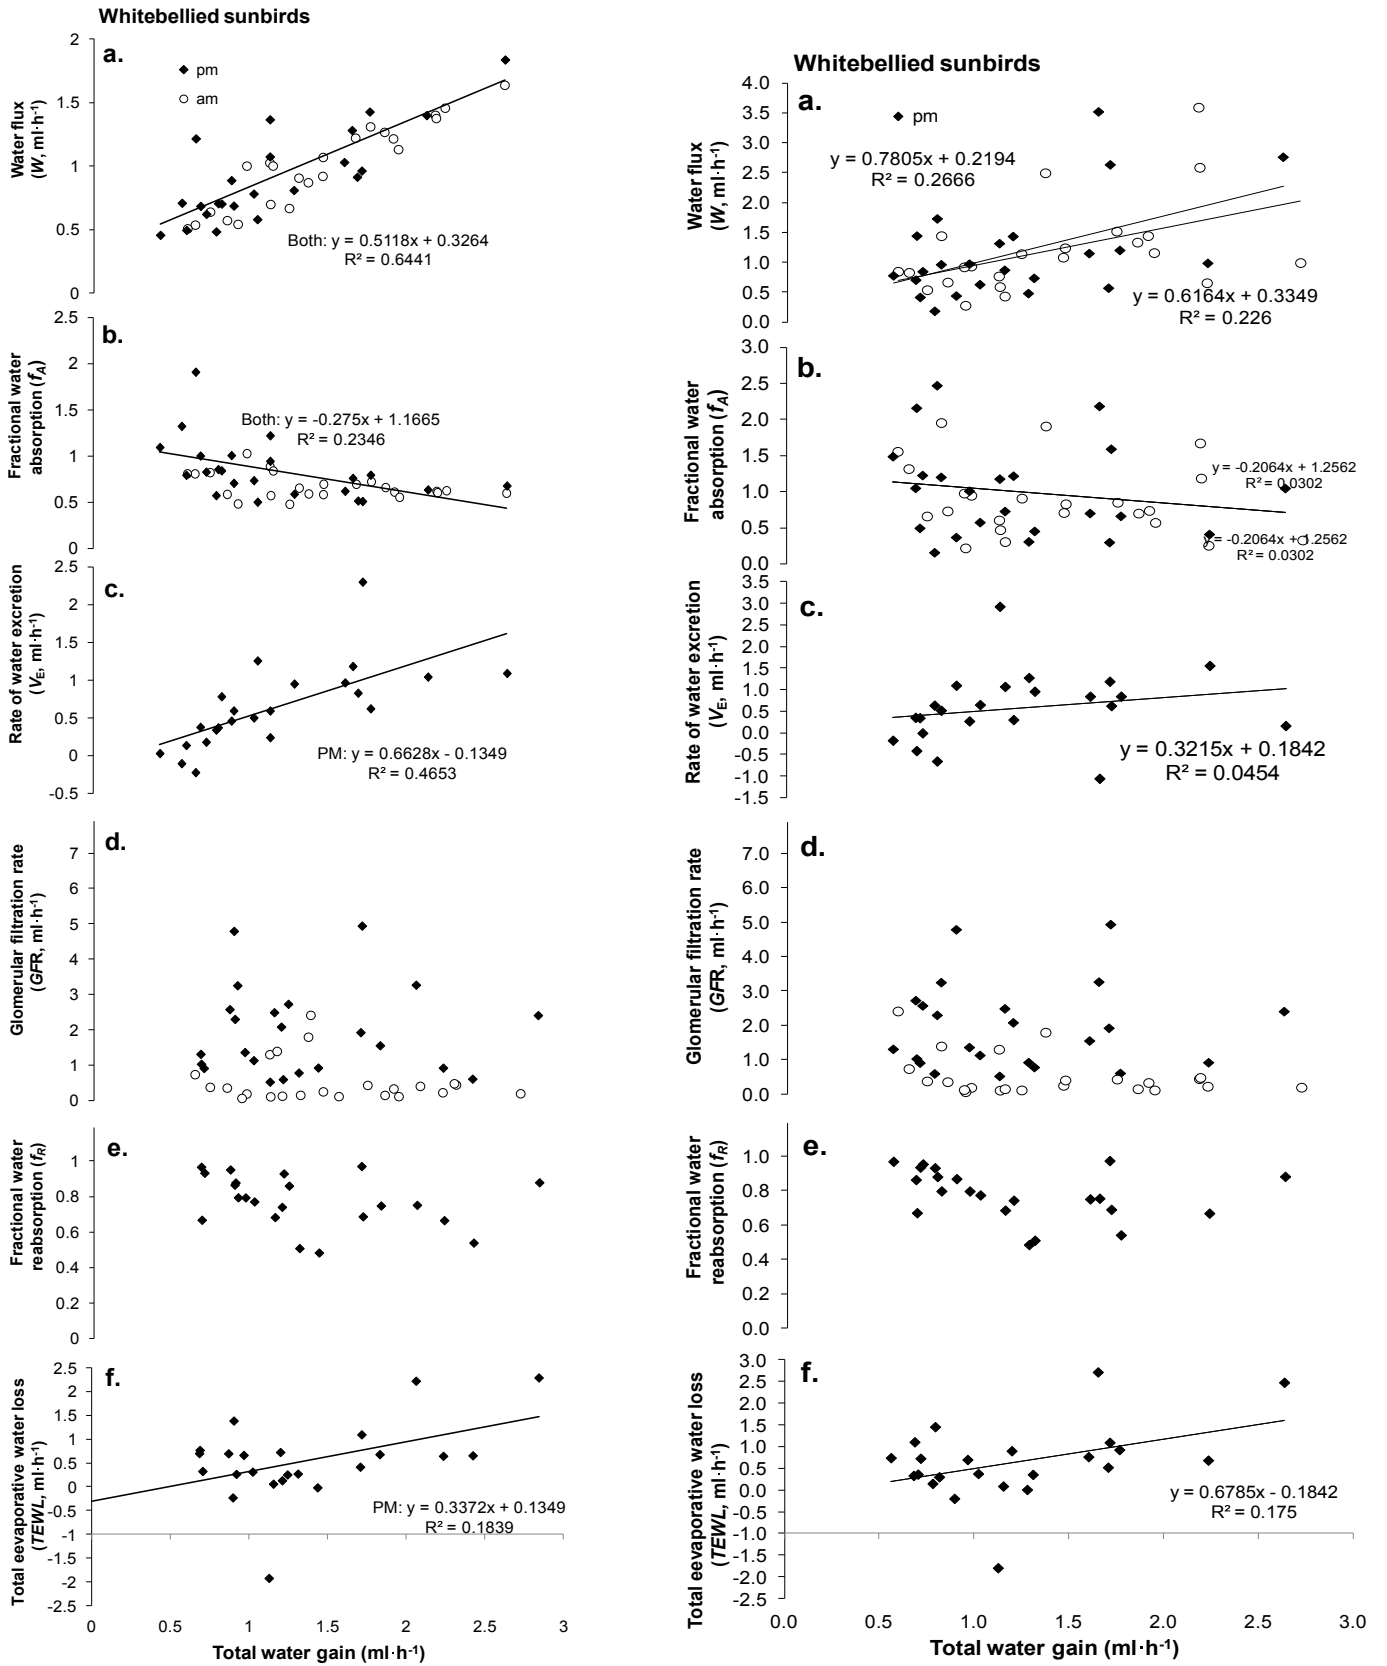

**Fig. S1.** Alternative version of Figure 2. The influence of water intake rates (x-axes) on the water handling processes during the afternoon (◆) and morning (○) in whitebellied sunbirds either with (left hand panel) or without (right hand panel) the adjustment for feeding time.

Adjusted for non-feeding time

Not adjusted for non-feeding time

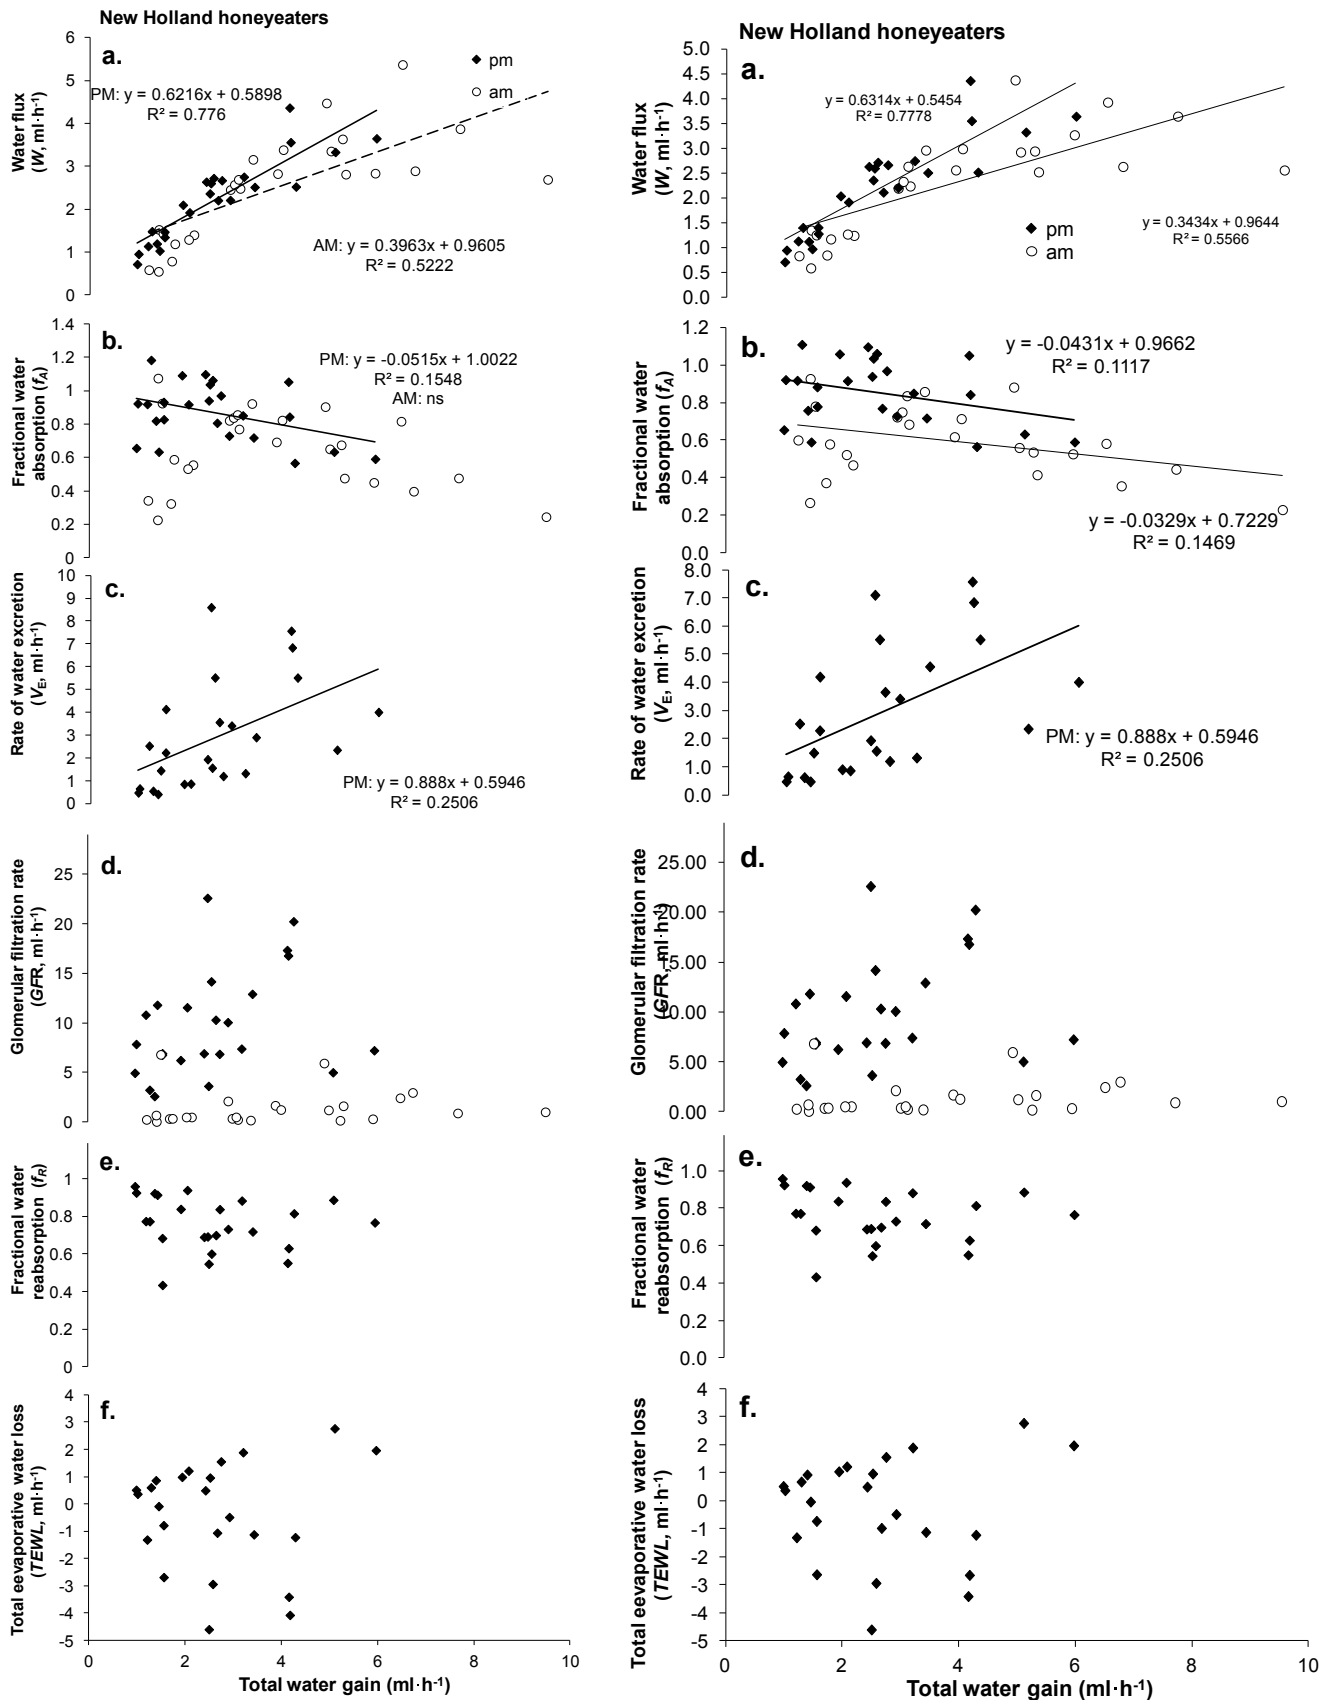

**Fig. S2.** Alternative version of Figure 3. The influence of water intake rates on the water handling processes during the afternoon ( $\blacklozenge$  and  $\circ$ ) in New Holland honeyeaters either with (left hand panel) or without (right hand panel) the adjustment for feeding time.
